# Supplementary material
Source: Research Square preprint supplement (doi:10.21203/rs.3.rs-9261032/v1)
Supplement: Supplementary file 1 [file 7dc21a6935053a3ff1d96bdb.pdf]

**Additional File 1- Sensibility of the Episodic Disability Questionnaire among adults living with Long COVID in Canada, Ireland, the United Kingdom, and the United States**

**Sensibility Questionnaire**

Please click on the number ranging from 1 (highly disagree) to 7 (highly agree) that describes the extent to which you agree with each of the following statements pertaining to both the EDQ and LC-EDQ Supplement Questionnaires.

|                                                                                                                    | Highly disagree<br>1     | 2                        | Disagree<br>3            | 4                                   | Agree<br>5               | 6                        | Highly agree<br>7        |
|--------------------------------------------------------------------------------------------------------------------|--------------------------|--------------------------|--------------------------|-------------------------------------|--------------------------|--------------------------|--------------------------|
| 1. I was able to <b>answer all of the questions.</b>                                                               | <input type="checkbox"/> | <input type="checkbox"/> | <input type="checkbox"/> | <input type="checkbox"/>            | <input type="checkbox"/> | <input type="checkbox"/> | <input type="checkbox"/> |
| 2. <b>The instructions were clear</b> and easy to understand.                                                      | <input type="checkbox"/> | <input type="checkbox"/> | <input type="checkbox"/> | <input type="checkbox"/>            | <input type="checkbox"/> | <input type="checkbox"/> | <input type="checkbox"/> |
| 3. <b>The questions were clear</b> and easy to understand.                                                         | <input type="checkbox"/> | <input type="checkbox"/> | <input type="checkbox"/> | <input type="checkbox"/>            | <input type="checkbox"/> | <input type="checkbox"/> | <input type="checkbox"/> |
| 4. Overall, the EDQ and LC-EDQ Supplement <b>make sense.</b>                                                       | <input type="checkbox"/> | <input type="checkbox"/> | <input type="checkbox"/> | <input type="checkbox"/>            | <input type="checkbox"/> | <input type="checkbox"/> | <input type="checkbox"/> |
| 5. The <b>response categories for the questions were adequate.</b>                                                 | <input type="checkbox"/> | <input type="checkbox"/> | <input type="checkbox"/> | <input type="checkbox"/>            | <input type="checkbox"/> | <input type="checkbox"/> | <input type="checkbox"/> |
| 6. The EDQ and LC-EDQ Supplement <b>captured all elements of my disability.</b>                                    | <input type="checkbox"/> | <input type="checkbox"/> | <input type="checkbox"/> | <input checked="" type="checkbox"/> | <input type="checkbox"/> | <input type="checkbox"/> | <input type="checkbox"/> |
| 7. The EDQ and LC-EDQ Supplement <b>included important questions</b> that are necessary to describe my disability. | <input type="checkbox"/> | <input type="checkbox"/> | <input type="checkbox"/> | <input type="checkbox"/>            | <input type="checkbox"/> | <input type="checkbox"/> | <input type="checkbox"/> |
| 8. The EDQ and LC-EDQ Supplement included questions that were <b>repetitive or redundant.</b>                      | <input type="checkbox"/> | <input type="checkbox"/> | <input type="checkbox"/> | <input type="checkbox"/>            | <input type="checkbox"/> | <input type="checkbox"/> | <input type="checkbox"/> |

**Additional File 1-** Sensibility of the Episodic Disability Questionnaire among adults living with Long COVID in Canada, Ireland, the United Kingdom, and the United States

|                                                                                                                                                                                                                                                                             | Highly disagree<br>1     | 2                        | Disagree<br>3            | 4                        | Agree<br>5               | 6                        | Highly agree<br>7        |
|-----------------------------------------------------------------------------------------------------------------------------------------------------------------------------------------------------------------------------------------------------------------------------|--------------------------|--------------------------|--------------------------|--------------------------|--------------------------|--------------------------|--------------------------|
| <p><b>9. There were questions missing</b> in the EDQ and LC-EDQ Supplement that should be included.</p> <p align="center">You indicated that there were questions missing from the EDQ and LC-EDQ Supplement. Please describe <b>what questions were missing</b>:</p> <hr/> | <input type="checkbox"/> |
| <b>10. Some of the questions seemed out of order.</b>                                                                                                                                                                                                                       | <input type="checkbox"/> |
| <b>11. I was able to find my answer</b> in the list of possible answers to the questions.                                                                                                                                                                                   | <input type="checkbox"/> |
| <b>12. I felt that the questions made me think about things that I would have preferred not to have thought about.</b>                                                                                                                                                      | <input type="checkbox"/> |
| <b>13. I felt that answering the questions helped me in some way.</b>                                                                                                                                                                                                       | <input type="checkbox"/> |
| <b>14. The EDQ and LC-EDQ Supplement took too long</b> for me to complete.                                                                                                                                                                                                  | <input type="checkbox"/> |
| <b>15. The EDQ and LC-EDQ Supplement required too much effort</b> to complete.                                                                                                                                                                                              | <input type="checkbox"/> |
| <b>16. The EDQ and LC-EDQ Supplement were easy to complete.</b>                                                                                                                                                                                                             | <input type="checkbox"/> |

**Additional File 1-** Sensibility of the Episodic Disability Questionnaire among adults living with Long COVID in Canada, Ireland, the United Kingdom, and the United States

|                                                                                                                                                                                                                                            | Highly disagree<br>1     | 2                        | Disagree<br>3            | 4                        | Agree<br>5               | 6                        | Highly agree<br>7        |
|--------------------------------------------------------------------------------------------------------------------------------------------------------------------------------------------------------------------------------------------|--------------------------|--------------------------|--------------------------|--------------------------|--------------------------|--------------------------|--------------------------|
| <p><b>17. Hypothetically, I would like to receive a summary of my EDQ and LC-EDQ Supplement scores right after completing the questionnaires to help understand the areas (or domains) where I might experience health challenges.</b></p> | <input type="checkbox"/> |
| <p><b>18. Overall, the EDQ and LC-EDQ Supplement are useful in describing disability experienced by adults living with Long COVID.</b></p>                                                                                                 | <input type="checkbox"/> |
